# Supplementary material
Source: Springer Nature journal article supplement (https://www.springermedizin.de/resource/supplementary/12916_2013_957_MOESM3_ESM.pdf/9598906)

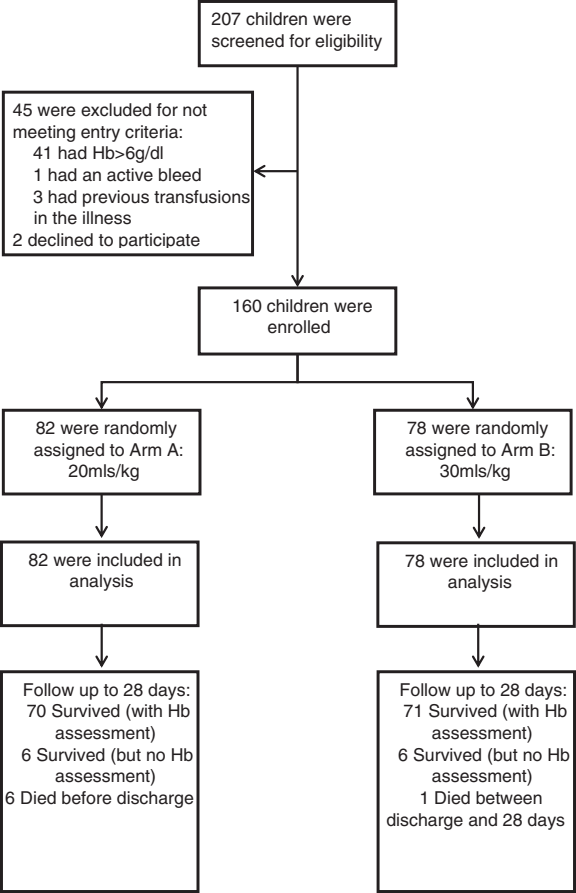

Supplement: MOESM3 [file 9598906]
